# Supplementary material for: Transcriptional changes associated with resistance to inhibitors of epidermal growth factor receptor revealed using metaanalysis
Source: Springer Nature journal article supplement (doi:10.1186/s12885-015-1337-3), 2015-05-06
Supplement: MOESM1 [file 9744466]

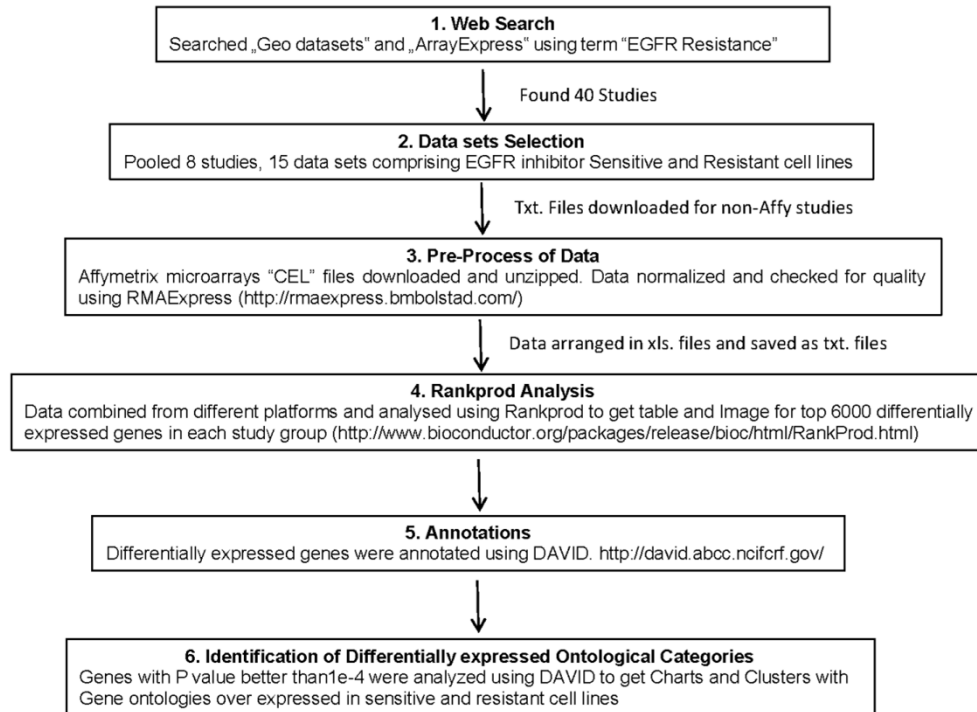

Figure 1. Flow chart of metaanalysis procedure.
