# Supplementary material for: Transcriptional changes associated with resistance to inhibitors of epidermal growth factor receptor revealed using metaanalysis
Source: Springer Nature journal article supplement (doi:10.1186/s12885-015-1337-3), 2015-05-06
Supplement: MOESM2 [file 9744466]

Figure 2. Differentially expressed genes in sensitive cell lines vs. resistant cell lines. Top panels genes overexpressed in resistant cell lines, bottom panels genes overexpressed in sensitive cell lines. a) All studies. b) Gefitinib. c) Erlotinib. d) Irreversible inhibitors. e) Cetuximab.

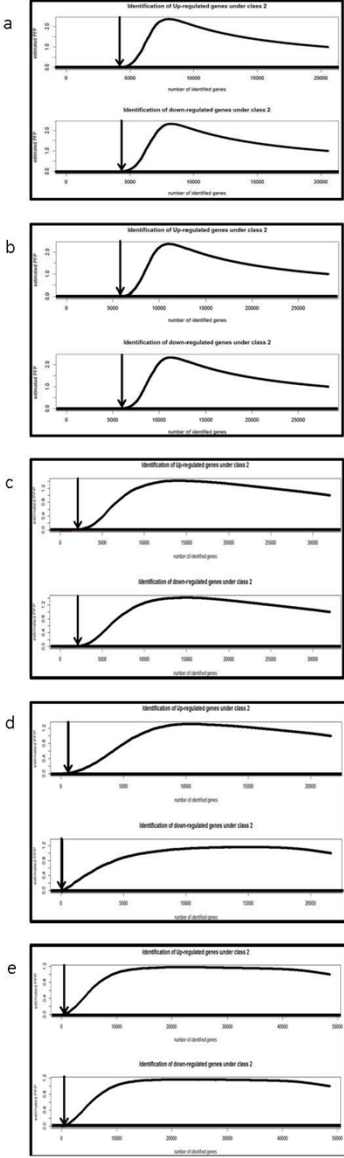

Figure 2: Differentially expressed genes in Sensitive cell lines vs Resistant cell lines a. All Studies b. Gefitinib c. Erlotinib d. Irreversible e. Cetuximab
